# Supplementary material
Source: PubMed Central journal article supplement (PMC4655989)
Supplement: 10.1194_M063354_jlr.M063354-1.pdf [file 10.1194_M063354_jlr.M063354-1.pdf]

**Supplemental Table 1. PCR primers: 5' → 3'.**

|              |          |                         |
|--------------|----------|-------------------------|
| <i>Abcg1</i> | Forward: | GTGGATGAGGTTGAGACAGACC  |
|              | Reverse: | CCTCGGGTACAGAGTAGGAAAG  |
| <i>Abca1</i> | Forward: | GGACATGCACAAGGTCCTGA    |
|              | Reverse: | CAGAAAATCCTGGAGCTTCAAA  |
| <i>IL6</i>   | Forward: | TAGTCCTTCCTACCCCAATTTCC |
|              | Reverse: | TTGGTCCTTAGCCACTCCTTC   |
| <i>Nos2</i>  | Forward: | GTTCTCAGCCCAACAATACAAGA |
|              | Reverse: | GTGGACGGGTCGATGTCAC     |
| <i>L32</i>   | Forward: | TTAAGCGAAACTGGCGGAAAC   |
|              | Reverse: | TTGTTGCTCCCATAACCGATG   |
| <i>Chil3</i> | Forward: | CAGGTCTGGCAATTCTTCTGAA  |
|              | Reverse: | GTCTTGCTCATGTGTGTAAGTGA |
| <i>Arg1</i>  | Forward: | CATGGGCAACCTGTGTCCTT    |
|              | Reverse: | TCCTGGTACATCTGGGAACTTTC |
