# Supplementary material
Source: PubMed Central journal article supplement (PMC4655989)
Supplement: 10.1194_M063354_jlr.M063354-2.pdf [file 10.1194_M063354_jlr.M063354-2.pdf]

**Supplemental Table 2. Body composition for obese and calorie restricted mice.** Wild-type (WT) C57BL6 male mice raised in the University of Washington vivarium were maintained on a high fat diet (HFD) for 13 weeks and then randomly assigned to continued *ad libitum* (AL) HFD feeding or caloric restriction (CR) for 3 weeks. Additional C57BL/6 WT mice were purchased directly from The Jackson Laboratory, were irradiated and received bone marrow from WT (WT-BMT) or *Abcg1*<sup>-/-</sup> (*Abcg1*<sup>-/-</sup> BMT) mice. Body weights prior to any treatment (including irradiation) are provided for mice at 13 – 14 weeks of age for the WT reference strain and for WT mice used for the BMT studies. Body composition was determined using quantitative magnetic resonance at 12 weeks of HFD feeding and 2 weeks after CR. Following CR, all three mouse groups lost significant amounts of body weight and fat.

| Body Wt (g) and Composition (%) | <i>Ad libitum</i> fed |            |                                 | After Caloric Restriction |             |                                 |
|---------------------------------|-----------------------|------------|---------------------------------|---------------------------|-------------|---------------------------------|
|                                 | <sup>a</sup> WT       | WT-BMT     | <i>Abcg1</i> <sup>-/-</sup> BMT | WT                        | WT-BMT      | <i>Abcg1</i> <sup>-/-</sup> BMT |
| Initial (g)                     | 30.0 ± 0.6            | 25.5 ± 0.4 | 25.0 ± 0.4                      | NA                        | NA          | NA                              |
| HFD (g)                         | 45.1 ± 1.7            | 31.7 ± 2.5 | 30.0 ± 1.6                      | 39.3* ± 2.1               | 25.7 ± 1.1* | 25.4 ± 0.9*                     |
| % Lean                          | 55.9 ± 1.3            | 70.0 ± 1.7 | 71.4 ± 1.5                      | 62.1 ± 1.6*               | 78.9 ± 2.3* | 78.8 ± 1.8*                     |
| % Fat                           | 41.9 ± 1.4            | 26.8 ± 1.9 | 25.6 ± 1.6                      | 34.8 ± 1.7*               | 18.1 ± 6.0* | 17.4 ± 1.9*                     |

<sup>a</sup>Values are mean ± SEM for n=17 (AL) and n=9 (CR). \* p<0.002 between AL and CR within the same mouse strain.
