# Supplementary material
Source: PubMed Central journal article supplement (PMC4655989)

**Supplemental Figure Legend:**

**Supplemental Figure. Relative mRNA levels for genes used to characterize bone marrow derived macrophages (BMDM), M1 and M2 cells.** PCR quantification was performed as described in Methods for nitric oxide synthase 2 (*Nos2*), interleukin 6 (*IL6*), *Chil3* and *Arg1*. (A) Relative mRNA levels for bone marrow cells taken from wild-type mice and (B) are relative mRNA levels for bone marrow cells taken from *Abcg1*<sup>-/-</sup> mice. mRNA levels were determined for BMDM, M1 and M2 macrophages. Values are given with respect to levels of BMDM set at '1' using L32 as a PCR control (n=3 separate mice).

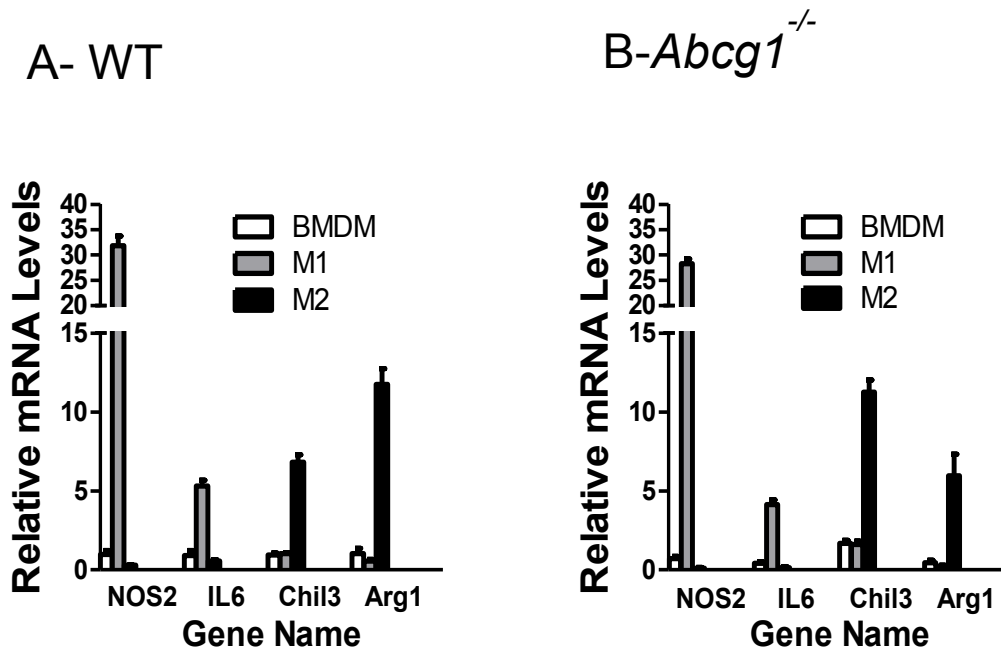

Supplement: 10.1194_M063354_jlr.M063354-3.pdf [file 10.1194_M063354_jlr.M063354-3.pdf]
